# Supplementary material for: A Disposable Carbon-Based Electrochemical Cell Modified With Carbon Black and Ag/δ-FeOOH for Non-enzymatic H2O2 Electro-Chemical Sensing
Source: Preprints.org preprint supplement (doi:10.20944/preprints202310.0476.v1), 2023-10-10
Supplement: Supplementary file 1 [file Support information.docx]

A disposable carbon-based electrochemical cell modified with carbon black and Ag/δ-FeOOH for non-enzymatic H2O2 electrochemical sensing

**Wiviane E. Reis1, Karoline S. Nantes1, Ana L. H. K. Ferreira1, Márcio C. Pereira1, Luiz H. C. Mattoso2, Ronaldo C. Faria3, André S. Afonso1***

1 Institute of Science, Engineering, and Technology, Federal University of Jequitinhonha and Mucuri Valleys,Teófilo Otoni 39803-371, Minas Gerais, Brazil.

2 Nanotechnology National Laboratory for Agriculture (LNNA), Embrapa Instrumentação, São Carlos, 13560-970, São Paulo, Brazil.

3 Chemistry Department, Federal University of São Carlos, CP 676, São Carlos 13565-905, São Paulo, Brazil.

***** Correspondence: andre.afonso@ufvjm.edu.br


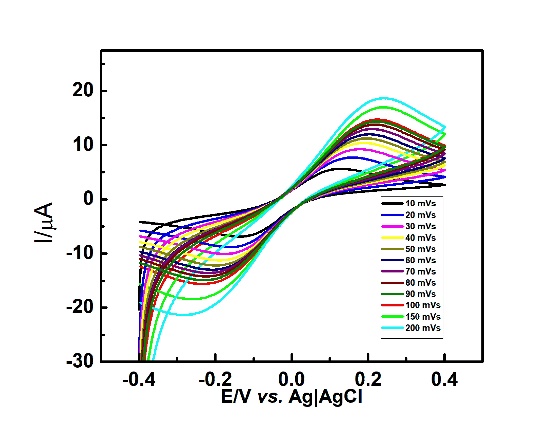

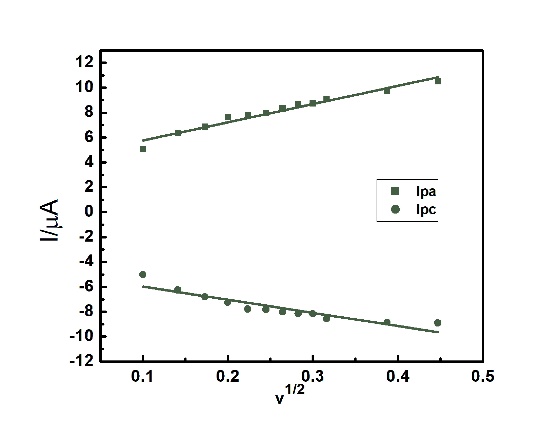


B

A


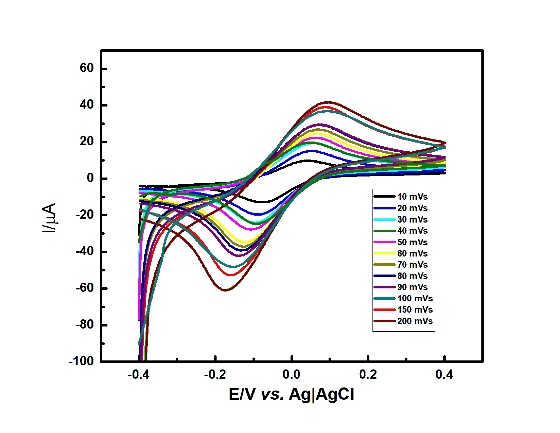

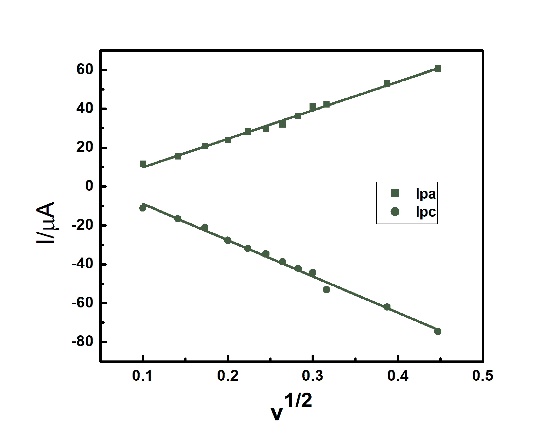


D

C


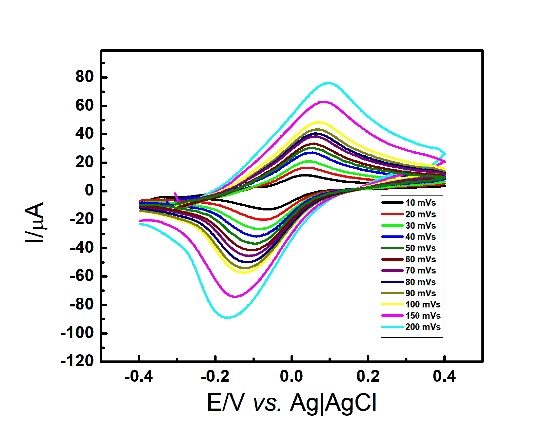

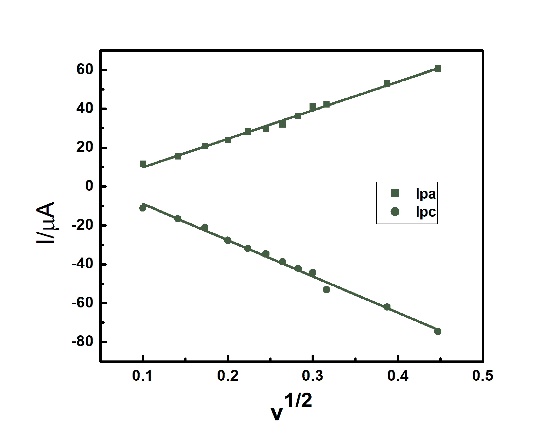


F

E

Figure SI 1: Cyclic voltammograms resulting from increasing scan rate (10 -200 mV s-1) and plot peak current versus square root of the scan rate at DCell (A and B) and DCell modified with Ag/δ-FeOOH (C and D) and DCell modified with CB//Ag/δ-FeOOH (E and F) in 1mM of K3Fe(CN)6 and 1 mM of K4Fe(CN)6 in 0,1 M KCl pH 3,2.

**Table SI 1 - LOD values for other modified electrodes for H2O2 detection**

| SAMPLE | LOD | REFERENCE |
| --- | --- | --- |
| Ag/δ-FeOOH | 71 µM | [1] |
| CFP/*α*-FeOOH | 18 µM | [2] |
| PPy/CB/α-Fe2O3  Fe3O4 – BCAMW  Fe3O4/Gr/CC  CB//Ag/δ-FeOOH | 52,8 nM  503 µM  4,79 µM  21,6 µM | [3]  [4]  [5]  (This work) |

LOD = detection limit; LOQ = quantification limit.

**References**

1. de Meira, F.H.A.; Resende, S.F.; Monteiro, D.S.; Pereira, M.C.; Mattoso, L.H.C.; Faria, R.C.; Afonso, A.S. A Non-enzymatic Ag/delta-FeOOH Sensor for Hydrogen Peroxide Determination using Disposable Carbon-based Electrochemical Cells. *Electroanalysis* **2020**, *32*, 2231-2236, doi:10.1002/elan.202060171.

2. Du, S.C.; Ren, Z.Y.; Wu, J.; Xi, W.; Fu, H.G. Vertical alpha-FeOOH nanowires grown on the carbon fiber paper as a free-standing electrode for sensitive H2O2 detection. *Nano Res.* **2016**, *9*, 2260-2269, doi:10.1007/s12274-016-1113-y.

3. Ahmed, J.; Faisal, M.; Jalalah, M.; Alsaiari, M.; Alsareii, S.A.; Harraz, F.A. An efficient amperometric catechol sensor based on novel polypyrrole-carbon black doped alpha-Fe2O3 nanocomposite. *Colloid Surf. A-Physicochem. Eng. Asp.* **2021**, *619*, 12, doi:10.1016/j.colsurfa.2021.126469.

4. Ates, A.; Oskay, K.O. Preparation and characterization of nanosized Fe3O4-biochar electrocatalysts with large surface area for H2O2 sensing. *Surf. Interfaces* **2022**, *29*, 14, doi:10.1016/j.surfin.2022.101733.

5. Sobahi, N.; Imran, M.; Khan, M.E.; Mohammad, A.; Alam, M.M.; Yoon, T.; Mehedi, I.M.; Hussain, M.A.; Abdulaal, M.J.; Jiman, A.A. Electrochemical Sensing of H2O2 by Employing a Flexible Fe3O4/Graphene/Carbon Cloth as Working Electrode. *Materials* **2023**, *16*, 18, doi:10.3390/ma16072770.
